# Supplementary material for: Tumor Volume Evaluation is a Superior Predictor of Prognosis Compared to RECIST in Metastatic Pancreatic Ductal Adenocarcinoma Undergoing Immunochemotherapy
Source: Research Square preprint supplement (doi:10.21203/rs.3.rs-7634457/v1), 2025-09-30
Supplement: Supplementary file 1 [file c56ee984639b2f0d2659ddd1.docx]

Appendix 1. Spherical equations for calculating thresholds

;

Partial response (PR):

Progressive disease (PD):

Appendix 2. Kaplan–Meier survival plots demonstrating subgroup analysis of patients with SD according to RECIST 1.1: diameter decrease vs. diameter increase


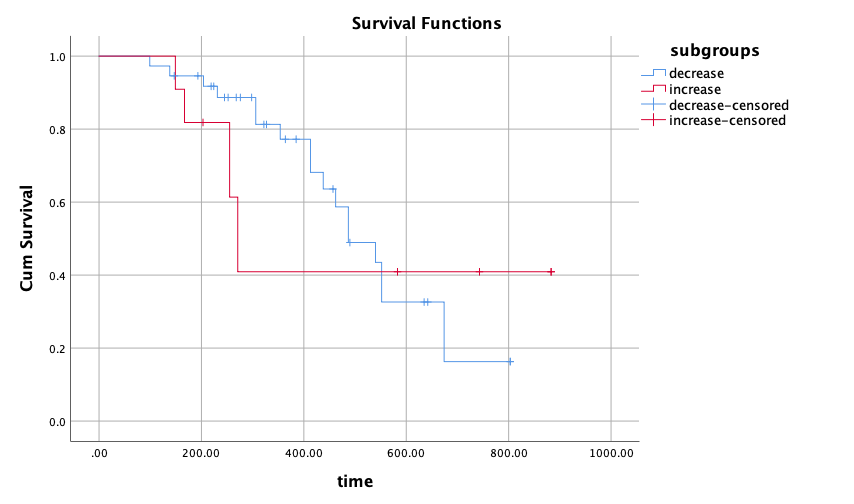


Appendix 3. Survival analysis of the two subgroups

|  | diameter decrease | diameter increase |
| --- | --- | --- |
| Number | 37 | 11 |
| N of events | 18 (48.6%) | 19 (51.4%) |
| N of censored | 6 (54.5%) | 5 (45.5%) |
| Median OS (days) | 487 | 271 |
| 95% CI | 381.9, 592.1 | 247.1, 294.9 |
| *p* value | .91 | |

Note. —*N*, number; *OS*, overall survival; *CI*, coefficient incidence.
